## Referees for Volume 51

The Editors are pleased to record their thanks to all those listed below who gave of their time and expertise to referee manuscripts submitted for Volume 51 of the *Journal*.

|                     |                   |                  |
|---------------------|-------------------|------------------|
| Andersen, V. (3)    | Frank, K.         | Murawski, S.     |
| Anderson, J. T.     | Frantzis, A.      | Murie, D. J.     |
| Atkinson, R. J. A.  | Fryer, R.         | Nedreaas, K. H.  |
| Bailey, K. M.       | Gamble, J. C. (2) | Nicholson, M.    |
| Banse, A.           | Garcia, A. (2)    | O'Doy, R.        |
| Banse, K.           | Goodyear, C. P.   | Overholtz, W.    |
| Beardmore, J. A.    | Gordon, J. D. M.  | Pages, F. (3)    |
| Bergh, M.           | Green, D.         | Pálsson, O. K.   |
| Bergstad, O. A. (2) | Gulliksen, B.     | Pelletier, D.    |
| Brander, K.         | Harbison, R.      | Pennington, M.   |
| Briggs, R.          | Hartnoll, R. S.   | Pepin, P.        |
| Bromley, P. J.      | Harwood, J.       | Pierce, G. J.    |
| Brown, J. B.        | Heessen, H. J. L. | Priede, I. G.    |
| Buskey, E.          | Heggenes, G.      | Purcell, J. (2)  |
| Caddy, J.           | Hernroth, L.      | Ré, P.           |
| Campana, S.         | Hoffman, M. E.    | Reinert, J.      |
| Carey, F. G.        | Holden, M. J.     | Rijnsdorp, A.    |
| Carre, C.           | Holliday, D. V.   | Sargent, J. R.   |
| Clark, W.           | Hopkins, C. C. E. | Schnack, D.      |
| Cochrane, N.        | Houde, E. D.      | Schneider, G.    |
| Coombs, S.          | Howell, B. R. (2) | Schwarz, C.      |
| Crisp, D. T.        | Jobling, M.       | Silvert, W.      |
| Cushing, D. H.      | Kenchinton, T.    | Simmonds, E. J.  |
| Dadswell, M.        | Kremer, P.        | Simmonds, J.     |
| de Groot, S. J.     | Krost, P.         | Stansbury, D.    |
| Dorm, M.            | Lane, D.          | Stanton, T. K.   |
| DuPouy, H.          | Lilly, G. R. (2)  | Stensen, G. B.   |
| Earll, R. L.        | Macdonald, A. D.  | Sullivan, B. (2) |
| Edwards, A.         | Magnússon, K. G.  | Theilacker, G.   |
| Farmer, D.          | McCleave, J. D.   | Thompson, G.     |
| Ferron, A.          | McEvoy, J. (2)    | Uye, S.          |
| Fives, J. M. (2)    | McEvoy, L. (2)    | van Beeln, F.    |
| Fonteyne, R.        | Metron, R. B.     | Warren, W. G.    |
| Foote, K. G. (3)    | Mills, C.         | Williams, R.     |
